# Supplementary material for: LINC00941 promotes glycolysis in pancreatic cancer by modulating the Hippo pathway
Source: PubMed Central journal article supplement — Mol Ther Nucleic Acids. 2021 Jul 16;26:280–94. doi: 10.1016/j.omtn.2021.07.004 (PMC8413680; doi:10.1016/j.omtn.2021.07.004), 2021-07-16
Supplement: mmc1.pdf [file mmc1.pdf]

OMTN, Volume 26

## **Supplemental information**

### **LINC00941 promotes glycolysis in pancreatic cancer by modulating the Hippo pathway**

**Ming Xu, Ran Cui, Lunhe Ye, Yongkun Wang, Xujing Wang, Qiqi Zhang, Kaijing Wang, Chunxiu Dong, Wenjun Le, and Bo Chen**

### Supplementary figure 1

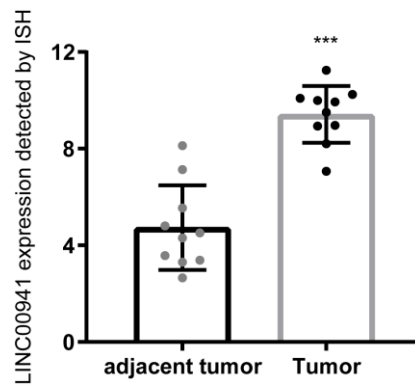

Statistical results of LINC00941 expression detected by in situ hybridization

### Supplementary figure 2

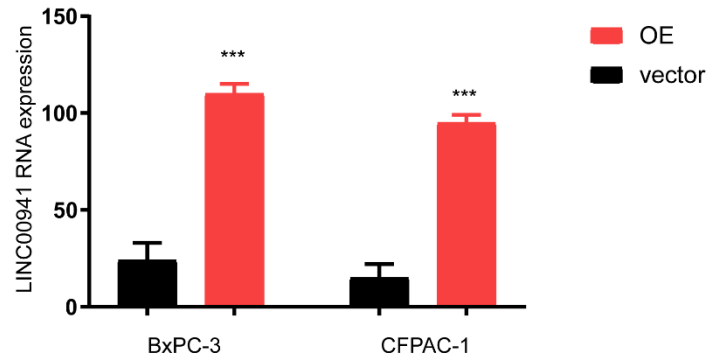

The efficiency of LINC00941 overexpression in PDAC cells

### Supplementary figure 3

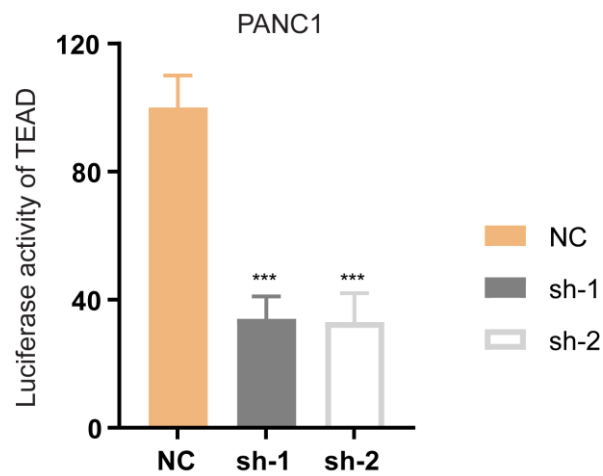

Transcriptional activity assay of TEAD1 in LINC00941 silenced PANC1 cell.

## Supplementary figure 4

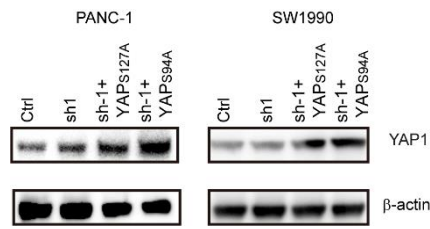

Mutant YAP1 ectopic expression in PDAC cells detected by WB

## Supplementary figure 5

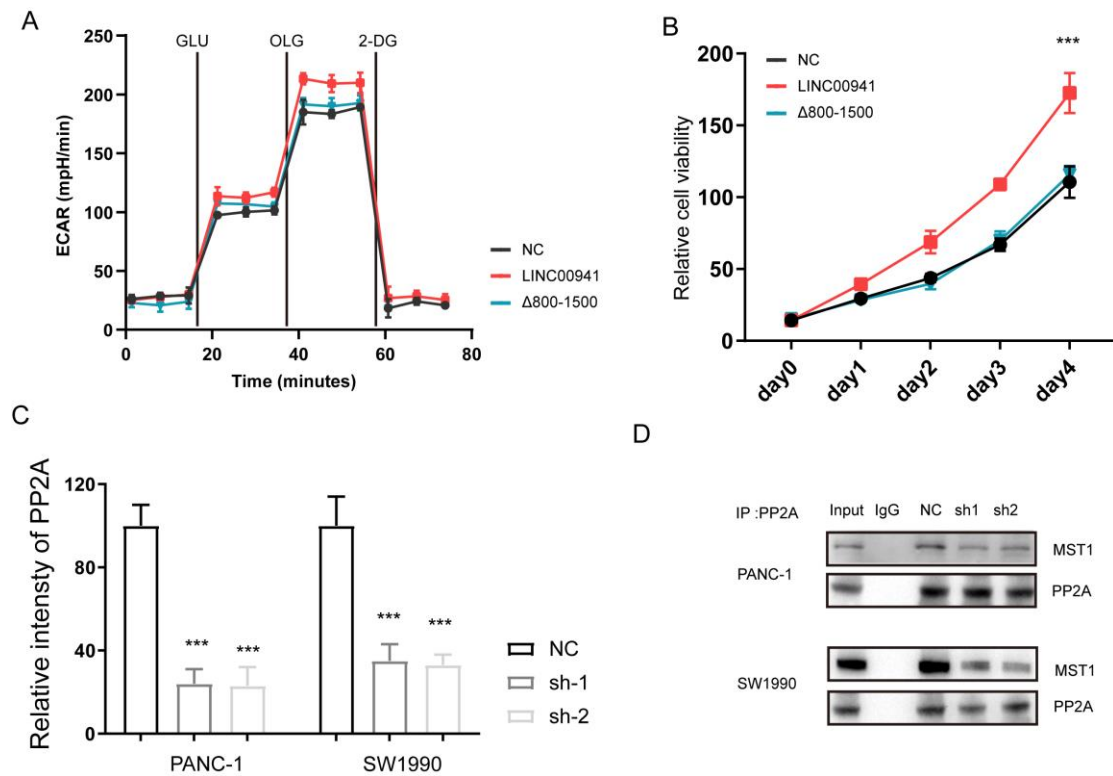

LINC00941 facilitates the interaction of MST1 and PP2A

A ECAR analysis of control, WT or (Δ800-1500) LINC00941 overexpression PANC1 cell. B. Cell viability assay of control, WT or (Δ800-1500) LINC00941 overexpression PANC1 cell. C. statistical results of relative PP2A intensity in MST1 IP experiment. D. Co-IP assays were performed with PP2A antibody in LINC00941 control and knockdown cells, following PP2A and MST1 detection.

## Supplementary figure 6

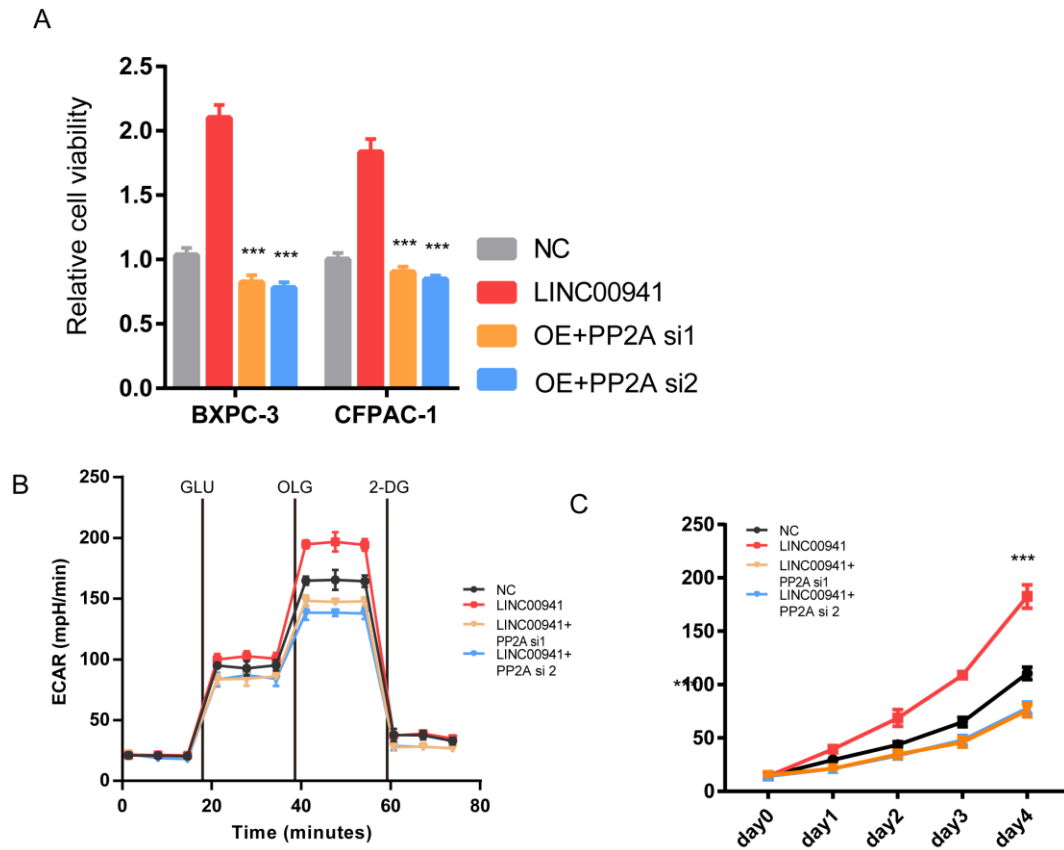

PP2A mediated the LINC009401 induced hippo pathway activation and cancer cell growth.

A. TEAD1 transcriptional activity assay of LINC00941 overexpressed BXPC-3 and CFPAC-1 cells upon PP2A knockdown or not. B-C. ECAR analysis (B) and cell viability assay (C) of control and LINC00941 overexpressed SW1990 upon PP2A knockdown or not.

### Supplementary table 1

Q-PCR primers used in this study

| Target name | Forward sequence       | Reverse sequence        |
|-------------|------------------------|-------------------------|
| GLUT1       | GGCCAAGAGTGTGCTAAAGAA  | ACAGCGTTGATGCCAGACAG    |
| HK2         | GAGCCACCACTCACCTACT    | CCAGGCATTCGGCAATGTG     |
| GPI         | CAAGGACCGCTTCAACCACTT  | CCAGGATGGGTGTGTTGACC    |
| PFKFB3      | TTGGCGTCCCCACAAAAGT    | AGTTGTAGGAGCTGTACTGCTT  |
| GAPDH       | GGAGCGAGATCCCTCCAAAAT  | GGCTGTTGTCATACTTCTCATGG |
| ALDOA       | ATGCCCTACCAATATCCAGCA  | GCTCCCAGTGGACTCATCTG    |
| PGAM1       | GTGCAGAAGAGAGCGATCCG   | CGTTAGACCCCCATAGTGC     |
| ENO1        | AAAGCTGGTGCCGTTGAGAA   | GGTTGTGGTAAACCTCTGCTC   |
| PKM2        | ATGTCGAAGCCCCATAGTGAA  | TGGGTGGTGAATCAATGTCCA   |
| LDHA        | ATGGCAACTCTAAAGGATCAGC | CCAACCCCAACAACCTGTAATCT |

### Supplementary table 2

CHIP-PCR primers used in this study

| Target name | Forward sequence      | Reverse sequence      |
|-------------|-----------------------|-----------------------|
| GLUT1       | TTGAGACTCAGAGAGGTGTGC | GGCTACTGACCACAGTCTG   |
| HK2         | GAGCCACCACTCACCTACT   | CCAGGCATTCGGCAATGTG   |
| LDHA        | GCTCCTTCCTGAGGCTATCTA | ACCTCTGGGCCTGTATTCT T |
